# Supplementary material
Source: publisher figshare collection journal article supplement (https://brill.figshare.com/articles/dataset/_/13712296)
Supplement: Supplementary file 1 [file 1]

## Guide to online figures

Figures 5a through 8a: these are color versions of their respective (a-less) black-and-white figures found in the printed version of the paper.

Figure 9: Reconstructed distribution of memory-places around the village of Mufu in a three-dimensional environment, ca. 1750.

Figure 10: Reconstructed distribution of memory-places around the village of Mufu in a three-dimensional environment, ca. 1830.

Figure 11: Reconstructed distribution of memory-places around the village of Mufu in a three-dimensional environment, ca. 1860.

Figure 12: Reconstructed distribution of memory-places around the village of Mufu in a three-dimensional environment, ca. 1900.

Figure 13: Reconstructed distribution of memory-places around the village of Ngun in a three-dimensional environment, ca. 1750.

Figure 14: Reconstructed distribution of memory-places around the village of Ngun in a three-dimensional environment, ca. 1830.

Figure 15: Reconstructed distribution of memory-places around the village of Ngun in a three-dimensional environment, ca. 1860.

Figure 16: Reconstructed distribution of memory-places around the village of Ngun in a three-dimensional environment, ca. 1900.

Figure 17: Chromatic representation of terrain inclination in Lower Fungom overlaid with reconstructed distribution of memory-places (black dots) irrespective of their village of pertinence, ca. 1900. The black rectangle encircles the area of Ngun, enlarged in figure 18.

Figure 18: Chromatic representation of terrain inclination in Ngun and its surroundings overlaid with distribution of memory-places (black dots) irrespective of their village of pertinence, ca. 1900.

Figure 19: Chromatic representation of data and metadata accuracy, irrespective of any other variable (all the points present in our database). Lower values indicate higher reliability. Values have been calculated by positing two basic degrees of quality (good vs. less good) for each of the following categories: (i) location (geotagged vs. reconstructed), (ii) description (direct source vs. induction/reconstruction), and (iii) chronology. The last is the only category represented by three distinct variables: for this reason, the scope of this thematic map is biased toward the chronological reliability of memory-places.

Movie 1: Auto-played overlay of figures 5a through 8a. Arrows connect village names with the presumed center of their current location.
